# Supplementary material for: Multi-component bioresponsive nanoparticles for synchronous delivery of docetaxel and TUBB3 siRNA to lung cancer cells
Source: Royal Society of Chemistry journal article supplement (doi:10.1039/d1nr02179f), 2021-01-01
Supplement: d1nr02179f1.pdf [file d1nr02179f1.pdf]

## **Multi-component bioresponsive nanoparticles for synchronous delivery of Docetaxel and TUBB3 siRNA to lung cancer cells**

Claudia Conte<sup>a,b,\*</sup>, Patrícia Monteiro<sup>a</sup>, Pratik Gurnani<sup>a</sup>, Snow Stolnik<sup>a</sup>, Francesca Ungaro<sup>b</sup>, Fabiana Quaglia<sup>b</sup>, Philip Clarke<sup>c</sup>, Anna Grabowska<sup>c</sup>, Maria Kavallaris<sup>d,e</sup> and Cameron Alexander<sup>a\*</sup>

<sup>a</sup>Division of Molecular Therapeutics and Formulation, School of Pharmacy, University of Nottingham, NG7 2RD, UK; <sup>b</sup>Drug Delivery Laboratory, Department of Pharmacy, University of Napoli Federico II, 80131 Napoli, Italy; <sup>c</sup>The BioDiscovery Institute and Faculty of Medicine & Health Sciences, University of Nottingham, NG7 2RD, UK; <sup>d</sup>Tumour Biology and Targeting Program, Children's Cancer Institute, Lowy Cancer Research Centre, University of New South Wales, Sydney, NSW 2052, Australia; <sup>e</sup>ARC Centre of Excellence in Convergent Bio-Nano Science and Technology and Australian Centre for NanoMedicine, University of New South Wales, Sydney, NSW 2052, Australia; <sup>f</sup>School of Women's and Children's Health, Faculty of Medicine, UNSW Sydney, NSW, Australia 2052.

\* Corresponding authors

claudia.conte@unina.it (C. Conte), cameron.alexander@nottingham.ac.uk (C. Alexander)

Table S1. Composition and properties of NPs loaded with Luc-siRNA.

| Code                  | siRNA<br>(% w/w) | Yield<br>(%) | Mean D <sub>H</sub><br>(nm) | P.I.  | ζ (mV) | siRNA<br>Actual loading <sup>a</sup><br>(Entr. Eff % <sup>b</sup> ) |
|-----------------------|------------------|--------------|-----------------------------|-------|--------|---------------------------------------------------------------------|
| Luc-siRNA/PLGA-PEG    | 0.1              | 65           | 175                         | 0.115 | -7.4   | 0.1 (95)                                                            |
| Luc-siRNA/PLGA-SS-PEG | 0.1              | 71           | 152                         | 0.184 | -9.3   | 0.1 (94)                                                            |

<sup>a</sup> Actual loading is expressed as the amount (mg) of drug encapsulated *per* 100 mg of NPs.

Table S2. Composition and properties of NPs loaded with Cy<sup>TM</sup>3-siRNA.

| Code                                  | siRNA<br>(% w/w) | Mean D <sub>H</sub><br>(nm) | P.I.  | ζ (mV) | siRNA<br>Actual loading <sup>a</sup> |
|---------------------------------------|------------------|-----------------------------|-------|--------|--------------------------------------|
| Cy <sup>TM</sup> 3-siRNA/ PLGA-PEG    | 0.1              | 161                         | 0.125 | -6.4   | 0.1                                  |
| Cy <sup>TM</sup> 3-siRNA/ PLGA-SS-PEG | 0.1              | 148                         | 0.117 | -8.2   | 0.1                                  |

<sup>a</sup> Actual loading is expressed as the amount (mg) of drug encapsulated *per* 100 mg of NPs.

Table S3. IC<sub>50</sub> values (μg/mL) of free DTX and DTX- NPs with or without TUBB3-siRNA in A549 and H1299 lung cancer cells after 72 h of treatment.

|                       | A549                           |                   |                   | H1299                          |                   |                   |
|-----------------------|--------------------------------|-------------------|-------------------|--------------------------------|-------------------|-------------------|
|                       | IC <sub>50</sub><br>(μg/mL±SD) | P.F. <sup>a</sup> | P.F. <sup>b</sup> | IC <sub>50</sub><br>(μg/mL±SD) | P.F. <sup>a</sup> | P.F. <sup>b</sup> |
| Free DTX              | 102.6±2.0                      | -                 | -                 | 0.4±0.1                        | -                 | -                 |
| DTX/PLGA-PEG          | 132.8±1.4                      | <1                | -                 | 3.4±0.1                        | <1                | -                 |
| TUBB3-DTX/PLGA-PEG    | 98.7±1.7                       | <1                | 1.3               | 2.9±0.1                        | 1.2               | <1                |
| DTX/PLGA-SS-PEG       | 79.8±1.9                       | 1.3               | -                 | 8.3±0.2                        | <1                | -                 |
| TUBB3-DTX/PLGA-SS-PEG | 6.5±2.0                        | 16                | 12.3              | 0.4±0.04                       | <1                | 16                |

<sup>a</sup> Potentiating factor values of NPs versus free DTX

<sup>b</sup> Potentiating factor values of DTX/*TUBB3*-NPs versus the corresponding DTX-NPs

Table S4. Composition and properties of NPs loaded with a scrambled siRNA.

| Code                            | siRNA<br>(% w/w) | Mean<br>D <sub>H</sub> (nm) | P.I. | ζ (mV)   | siRNA<br>Actual loading <sup>a</sup><br>(Entr. Eff % <sup>b</sup> ) |
|---------------------------------|------------------|-----------------------------|------|----------|---------------------------------------------------------------------|
| scrambled-siRNA/PLGA-<br>PEG    | 0.1              | 176±4                       | 0.12 | -1.6±2.3 | 0.1 (95)                                                            |
| scrambled-siRNA/PLGA-<br>SS-PEG | 0.1              | 187±3                       | 0.15 | -1.9±4.4 | 0.1 (94)                                                            |

### PLGA-PEG

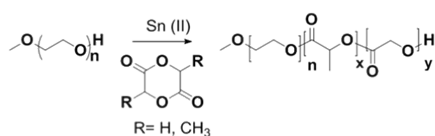

### PLGA-SS-PEG

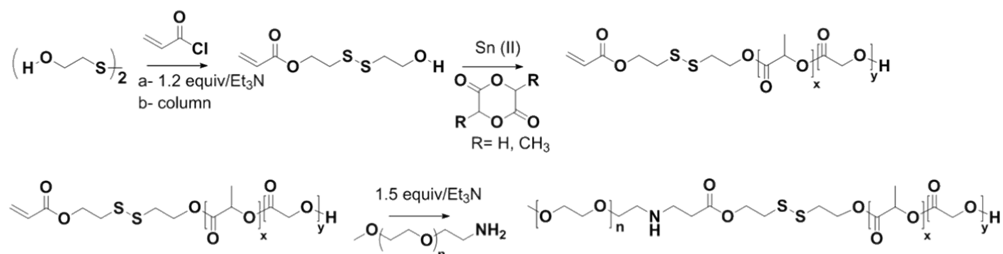

### OBAE

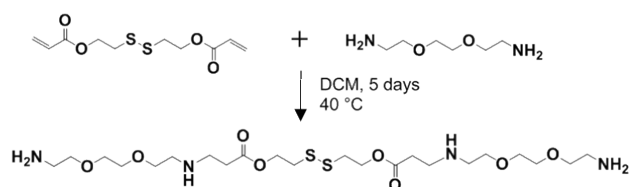

Figure S1. Schematic illustration of synthesis of the materials

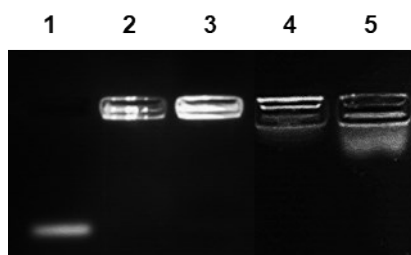

**Figure S2.** Gel retardation assay of siRNA-loaded NPs. Lane 1: naked TUBB3-siRNA; lane 2-3: TUBB3-DTX/PLGA-PEG NPs and TUBB3-DTX/PLGA-SS-PEG NPs; lane 4-5: TUBB3-DTX/PLGA-PEG NPs and TUBB3-DTX/PLGA-SS-PEG NPs after incubation in GSH 10 mM for 30 minutes.

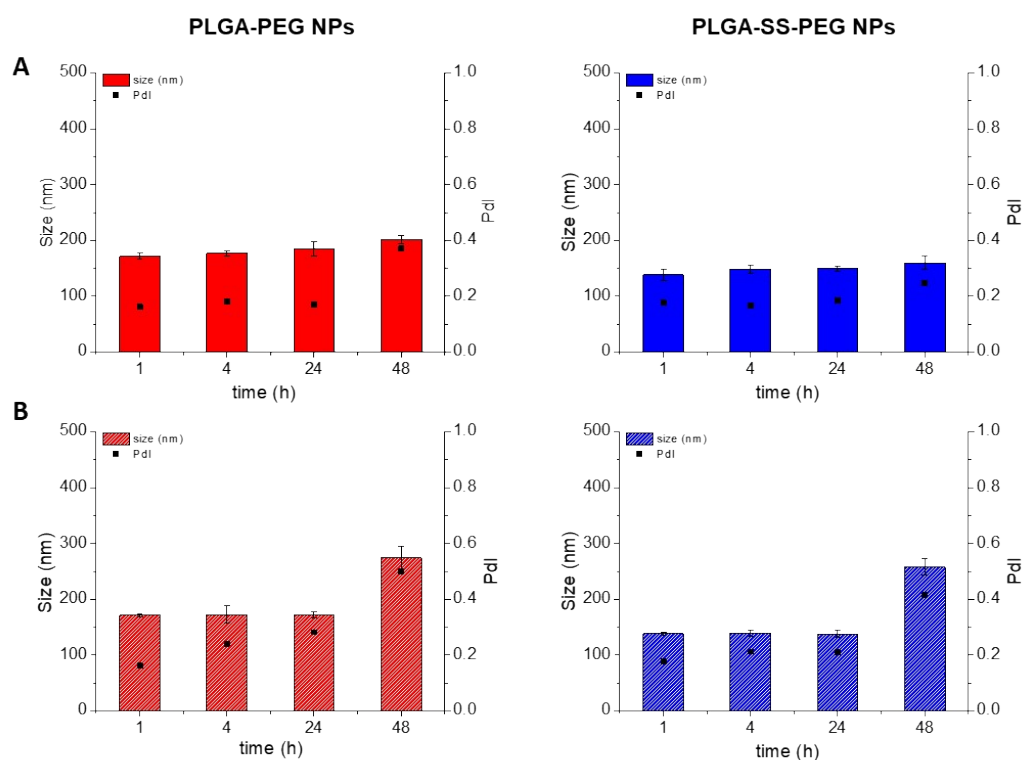

Figure S3. Stability of NPs in PBS pH 7.4 (A) or PBS pH 7.4 with Fetal Bovine Serum 10% (B). Results are expressed as mean  $\pm$  SD of three experiments.

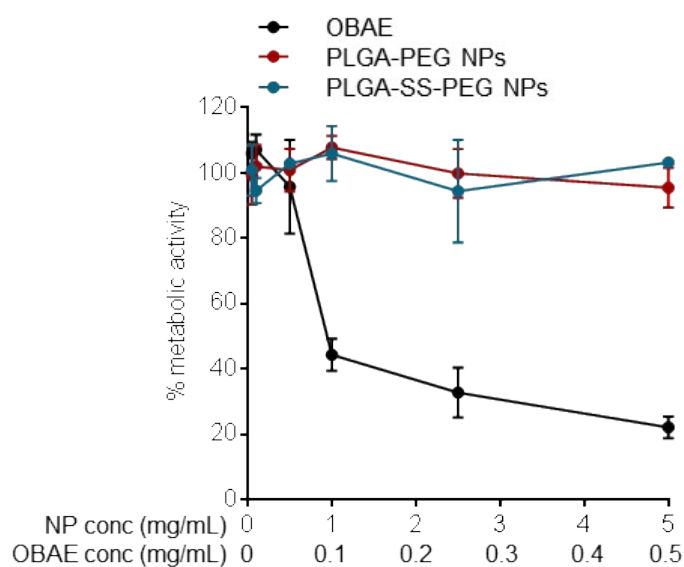

Figure S4. Cytotoxicity of unloaded NPs against H1299 cancer cells compared to free OBAE (24 h of incubation). Concentration of free OBAE is in the same range entrapped into NPs (0.005-0.5 mg/mL).

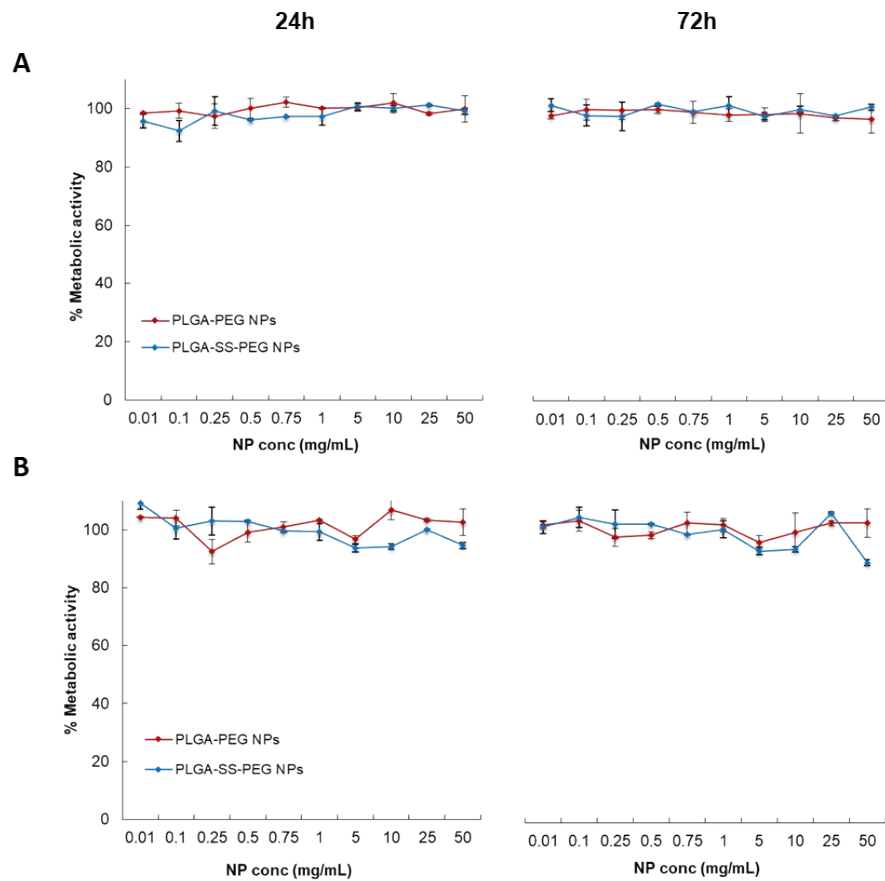

Figure S5. Cell metabolic activity of PLGA-PEG NPs and PLGA-SS-PEG NPs toward (A) A549 and (B) H1299 cells after 24 h and 72 h of incubation. Results are expressed as mean  $\pm$  SD of three experiments.

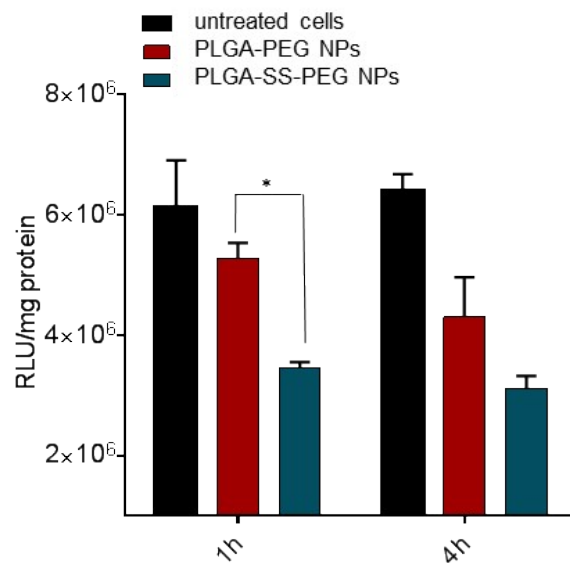

Figure S6. In vitro luciferase siRNA transfection efficacy of NPs in A549-luciferase expressing cells reported as relative light units (RLU/mg protein) of Luciferase activity. Results are expressed as mean  $\pm$  SD of three experiments. \*\* $P < 0.01$ , \* $P < 0.05$  two-way ANOVA test.

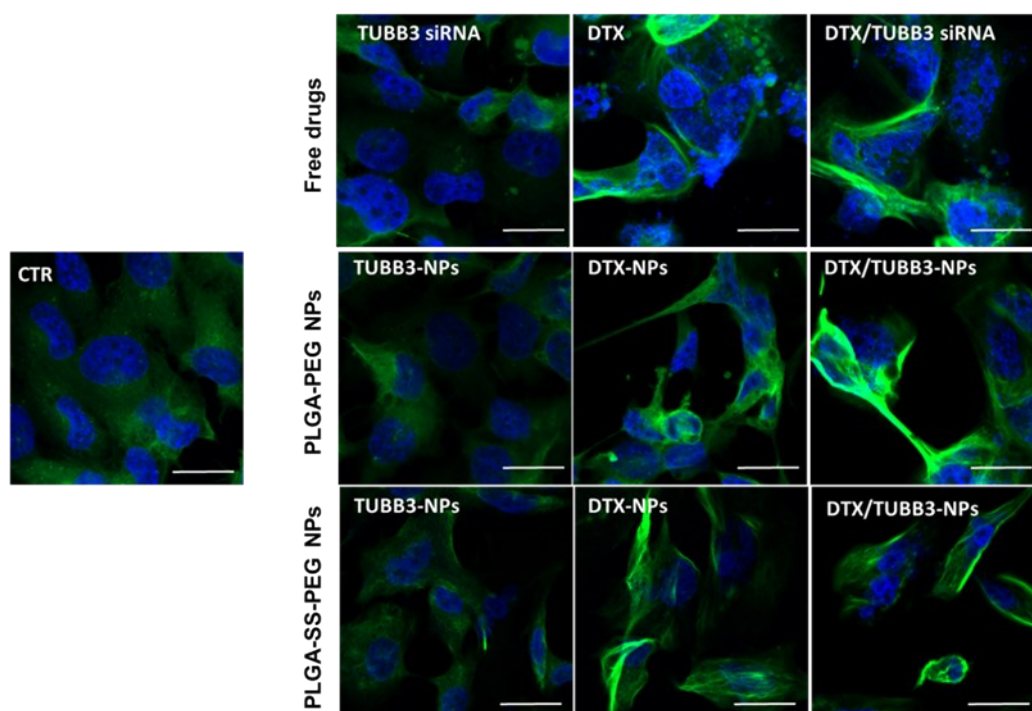

Figure S7. Immunofluorescence microscopy of H1299 cells treated with NPs for 72h.  $\beta$ III-tubulin was stained in green whereas nuclei were stained with Hoechst 33258 in blue. Scale bar: 10  $\mu$ m. Zen 2009 image Software was utilized for image processing.

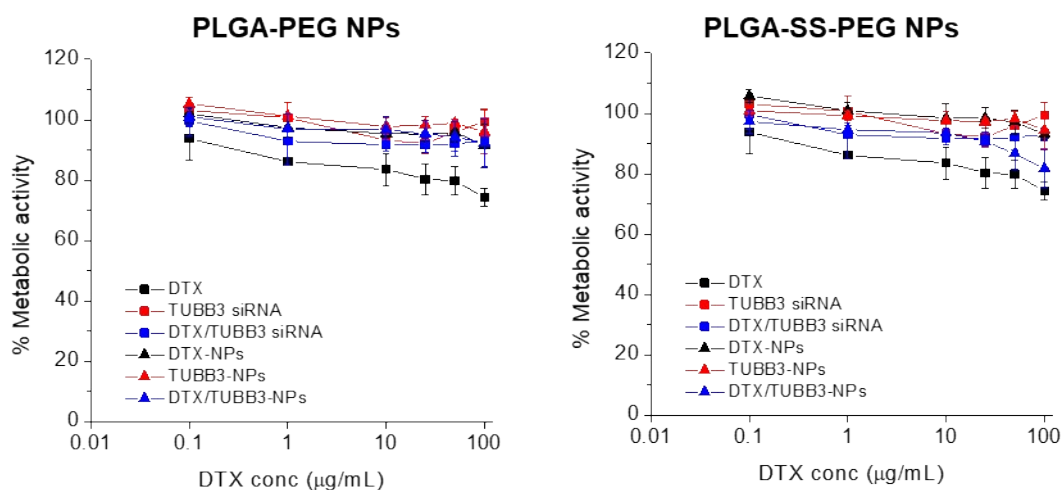

Figure S8. Cell metabolic activity of PLGA-PEG NPs and PLGA-SS-PEG NPs toward A549 cells after 24 h of incubation. Results are expressed as mean  $\pm$  SD of three experiments.

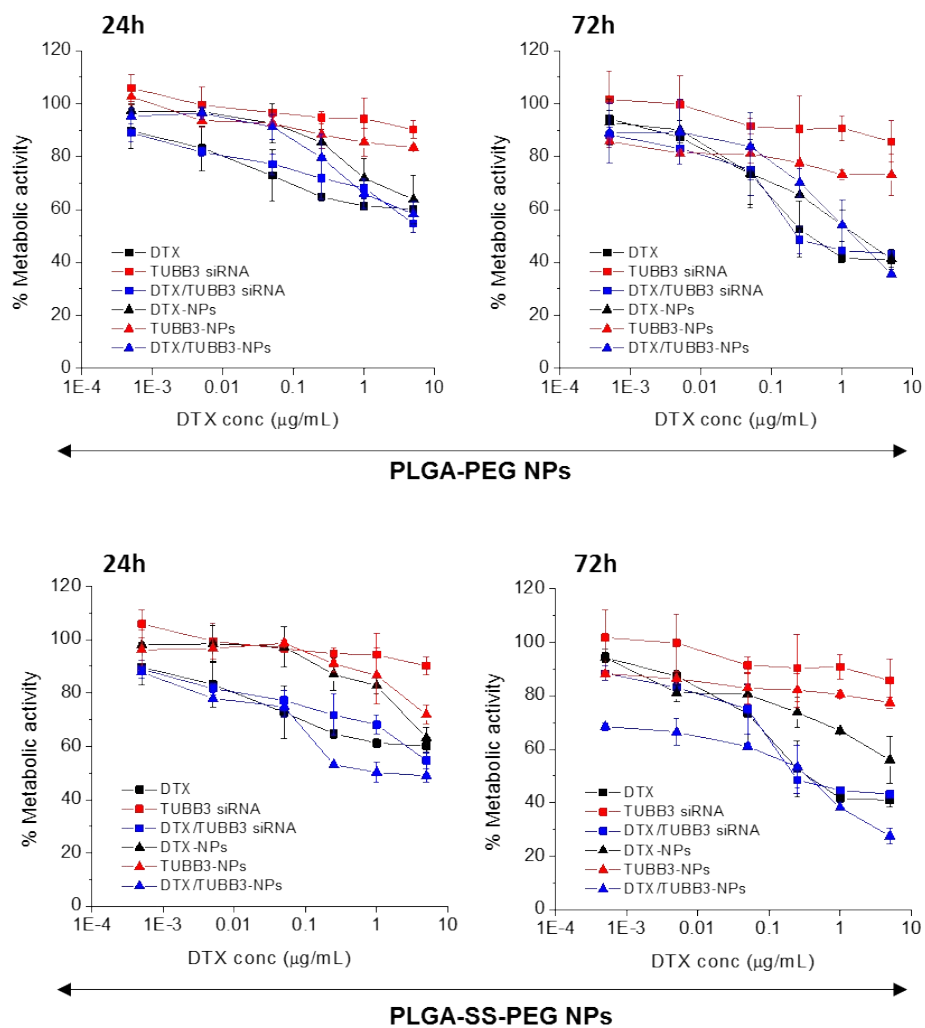

Figure S9. Cell metabolic activity of PLGA-PEG NPs and PLGA-SS-PEG NPs toward H1299 cells after 24 h and 72 h of incubation. Results are expressed as mean  $\pm$  SD of three experiments.

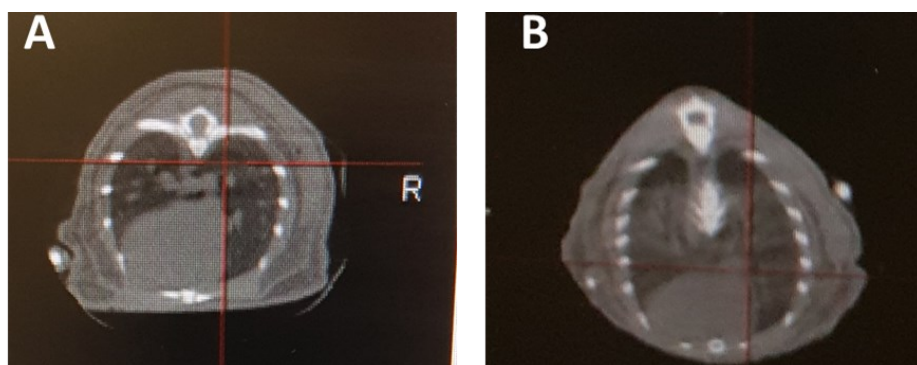

Figure S10. In vivo X-ray of lungs in A) healthy mice and B) tumor-bearing mice.

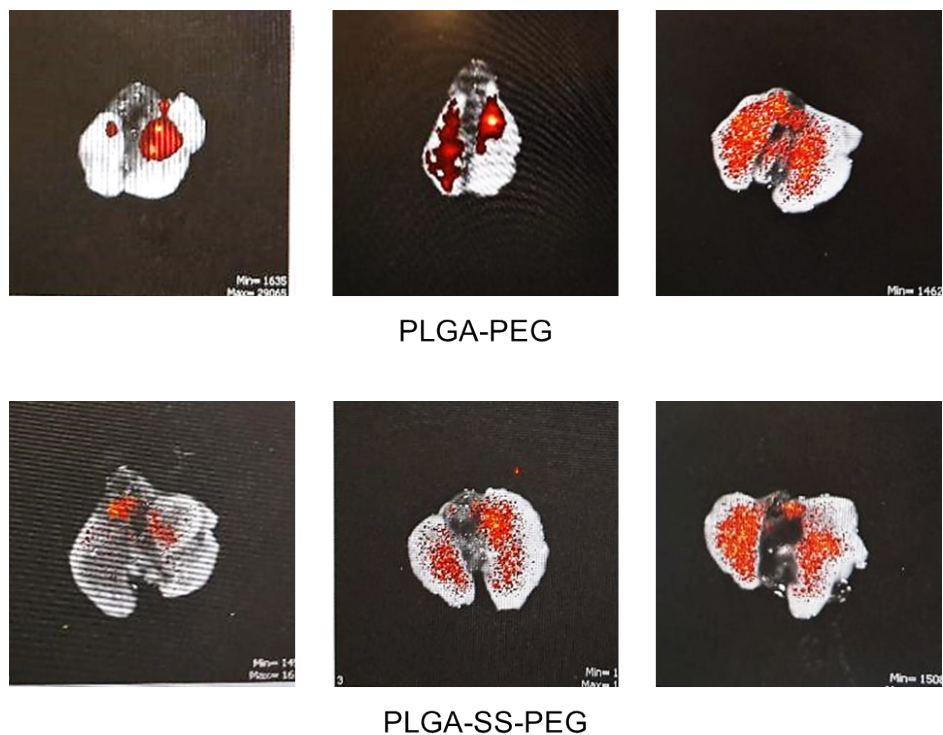

Figure S11. Live DiR fluorescence in the lungs 24 h after intratracheal administration of NPs. Each figure corresponds to 1 mouse. Ex/Em = 710/780 nm.

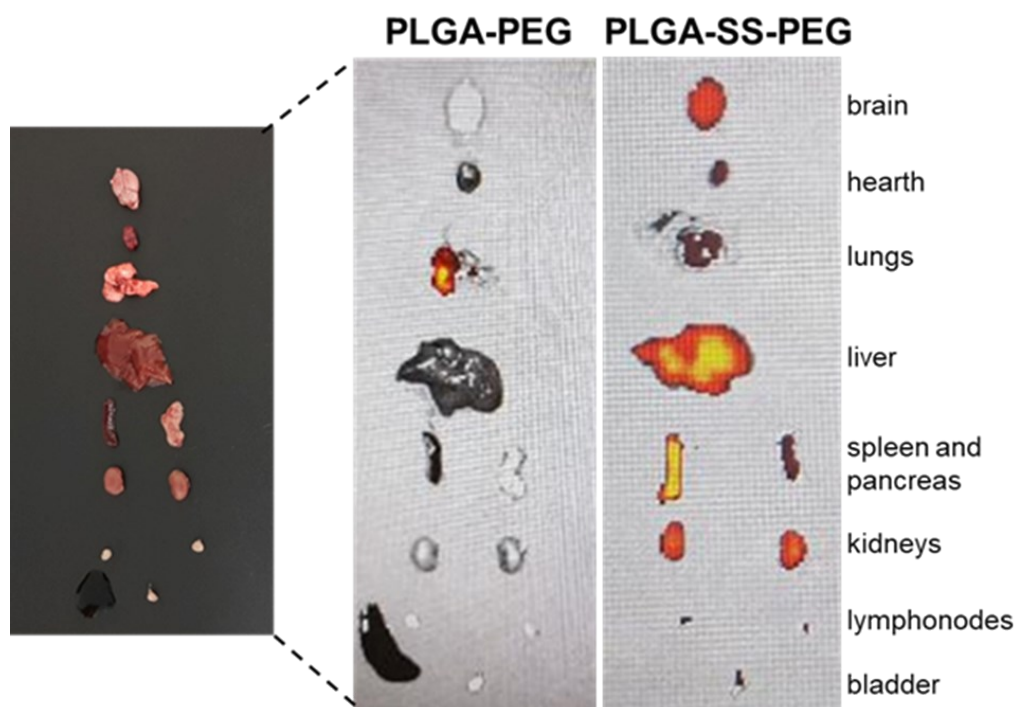

Figure S12. Ex vivo DiR fluorescence images of mice organs 24 h after intratracheal administration of NPs.
